# Supplementary material for: Room-temperature fabrication of defective CoOxHy nanosheets with abundant oxygen vacancies and high porosity as efficient 5-hydroxymethylfurfural oxidation electrocatalysts
Source: Royal Society of Chemistry journal article supplement (doi:10.1039/d3gc00588g), 2023-01-01
Supplement: d3gc00588g1.pdf [file d3gc00588g1.pdf]

**Room-temperature fabrication of defective  $\text{CoO}_x\text{H}_y$  nanosheets with abundant oxygen vacancies and high porosity as efficient 5-hydroxymethylfurfural oxidation electrocatalysts**

*Ruyi Zhong<sup>a</sup>, Puwei Wu<sup>a</sup>, Qi Wang<sup>b</sup>, Xiting Zhang<sup>a</sup>, Lei Du<sup>a</sup>, Yunhua Liu<sup>a</sup>, Huakang Yang<sup>a</sup>, Meng Gu<sup>b</sup>, Z. Conrad Zhang<sup>c</sup>, Limin Huang<sup>d,\*</sup>, and Siyu Ye<sup>a,\*</sup>*

<sup>a</sup>Huangpu Hydrogen Energy Innovation Center/Guangzhou Key Laboratory for Clean Energy and Materials, School of Chemistry and Chemical Engineering, Guangzhou University, Guangzhou 510006, P.R. China.

<sup>b</sup>Department of Materials Science and Engineering, Southern University of Science and Technology, Shenzhen 518055, P.R. China.

<sup>c</sup>Dalian National Laboratory for Clean Energy, Dalian Institute of Chemical Physics, Chinese Academy of Sciences, Dalian 116023, P.R. China.

<sup>d</sup>Department of Chemistry, Southern University of Science and Technology, Shenzhen 518055, P.R. China.

\* Corresponding author: [huanglm@sustech.edu.cn](mailto:huanglm@sustech.edu.cn) (L.-M. Huang); [siyu.ye@gzhu.edu.cn](mailto:siyu.ye@gzhu.edu.cn) (S. Ye)

**Table S1.** The fitted parameters of Nyquist plots of CoO<sub>x</sub>H<sub>y</sub>, CoO<sub>x</sub>H<sub>y</sub>-MA, CoO<sub>x</sub>H<sub>y</sub>-BH, and CoO<sub>x</sub>H<sub>y</sub>-MA/BH.

| Catalyst                               | R <sub>s</sub> (Ω) | R <sub>ct</sub> (Ω) | CPE-T (F) | CPE-P |
|----------------------------------------|--------------------|---------------------|-----------|-------|
| CoO <sub>x</sub> H <sub>y</sub>        | 11.6               | 36.7                | 0.0006    | 0.80  |
| CoO <sub>x</sub> H <sub>y</sub> -MA    | 10.9               | 8.1                 | 0.0035    | 0.88  |
| CoO <sub>x</sub> H <sub>y</sub> -BH    | 10.9               | 15.1                | 0.0026    | 0.77  |
| CoO <sub>x</sub> H <sub>y</sub> -MA/BH | 12.6               | 11.1                | 0.0022    | 0.81  |

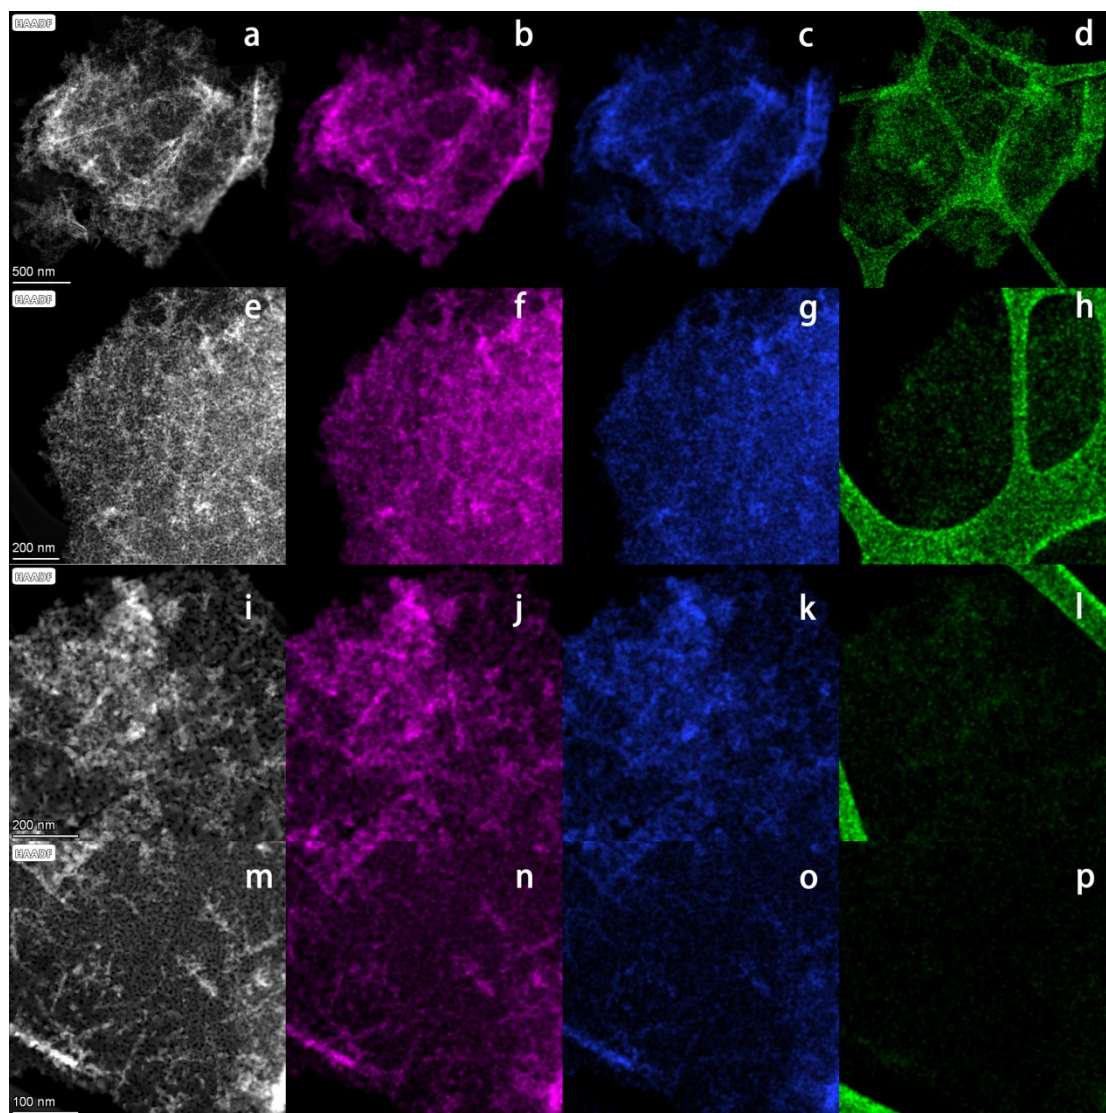

**Figure S1.** (a, e, i, m) The HAADF-STEM images, and the corresponding EDS mappings of (b-d)  $\text{Co}_3\text{O}_4$ -300, (f-h)  $\text{Co}_3\text{O}_4$ -300-MA, (j-l)  $\text{Co}_3\text{O}_4$ -300-BH, and (n-p)  $\text{Co}_3\text{O}_4$ -300-MA/BH. The Co, O, and C elements were represented in the color of magenta, blue, and green, respectively.

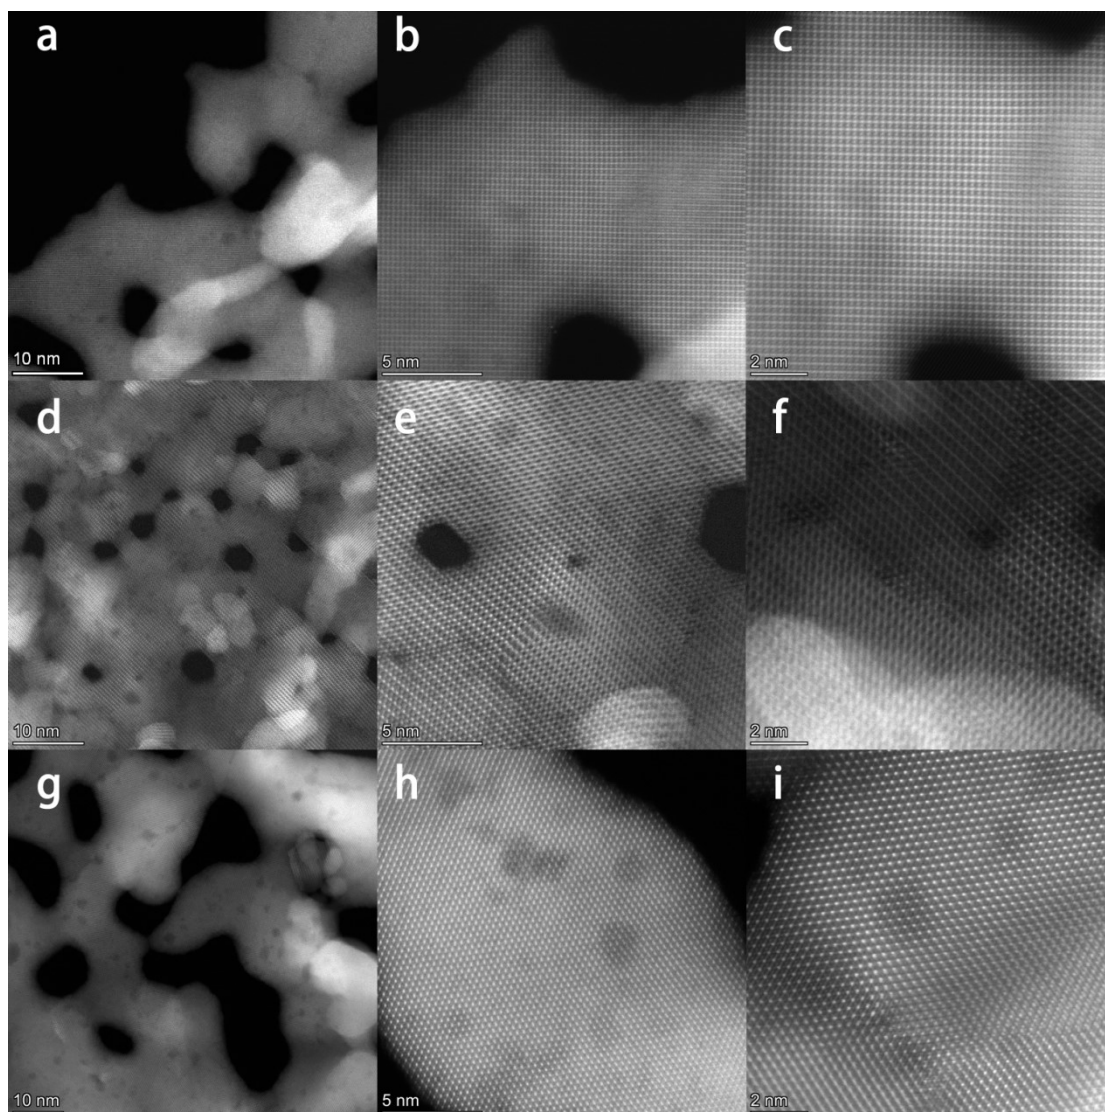

**Figure S2.** HRTEM images with increased magnifications of (a-c)  $\text{Co}_3\text{O}_4\text{-300-MA}$ , (d-f)  $\text{Co}_3\text{O}_4\text{-300-MA}$ , and (g-i)  $\text{Co}_3\text{O}_4\text{-300-MA/BH}$ .

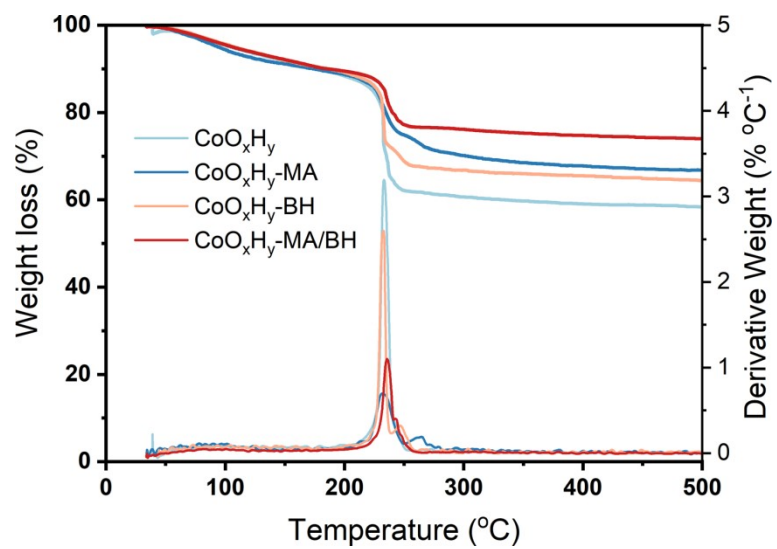

**Figure S3.** TGA/DTG profiles of  $\text{CoO}_x\text{H}_y$ ,  $\text{CoO}_x\text{H}_y\text{-MA}$ ,  $\text{CoO}_x\text{H}_y\text{-BH}$ , and  $\text{CoO}_x\text{H}_y\text{-MA/BH}$ .

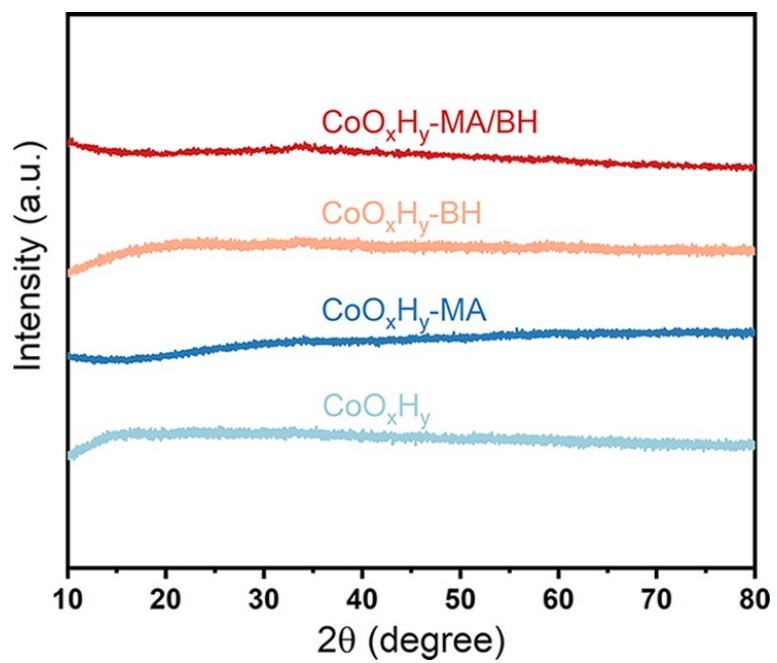

**Figure S4.** XRD patterns of  $\text{CoO}_x\text{H}_y$ ,  $\text{CoO}_x\text{H}_y\text{-MA}$ ,  $\text{CoO}_x\text{H}_y\text{-BH}$ , and  $\text{CoO}_x\text{H}_y\text{-MA/BH}$ .

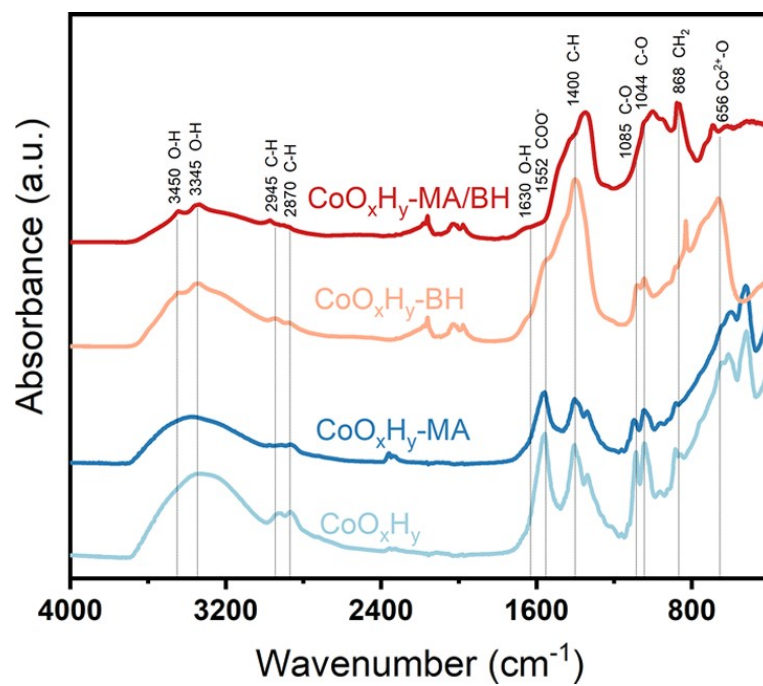

**Figure S5.** FTIR spectra of CoO<sub>x</sub>H<sub>y</sub>, CoO<sub>x</sub>H<sub>y</sub>-MA, CoO<sub>x</sub>H<sub>y</sub>-BH, and CoO<sub>x</sub>H<sub>y</sub>-MA/BH.

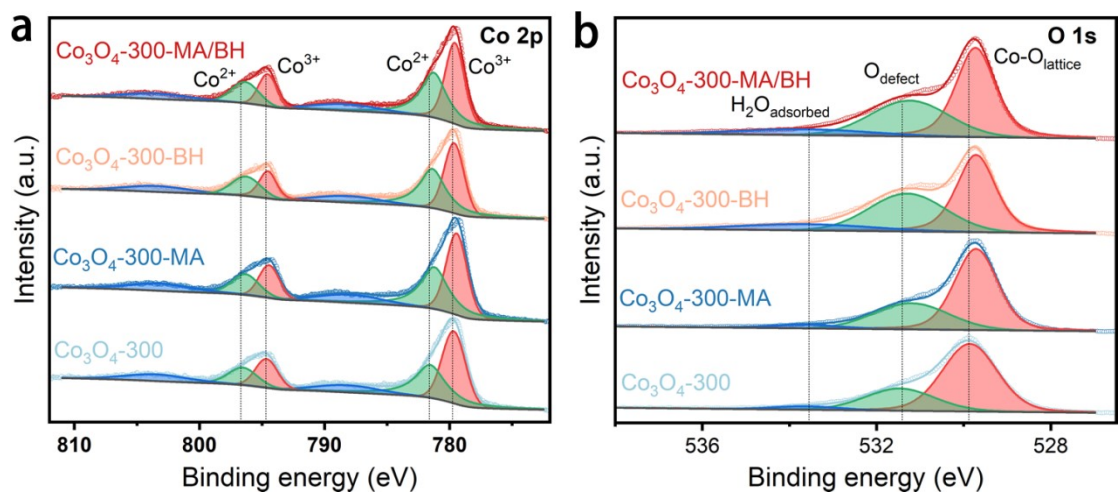

**Figure S6.** XPS (a) Co 2p and (b) O 1s spectra of  $\text{Co}_3\text{O}_4\text{-300}$ ,  $\text{Co}_3\text{O}_4\text{-300-MA}$ ,  $\text{Co}_3\text{O}_4\text{-300-BH}$ , and  $\text{Co}_3\text{O}_4\text{-300-MA/BH}$ .



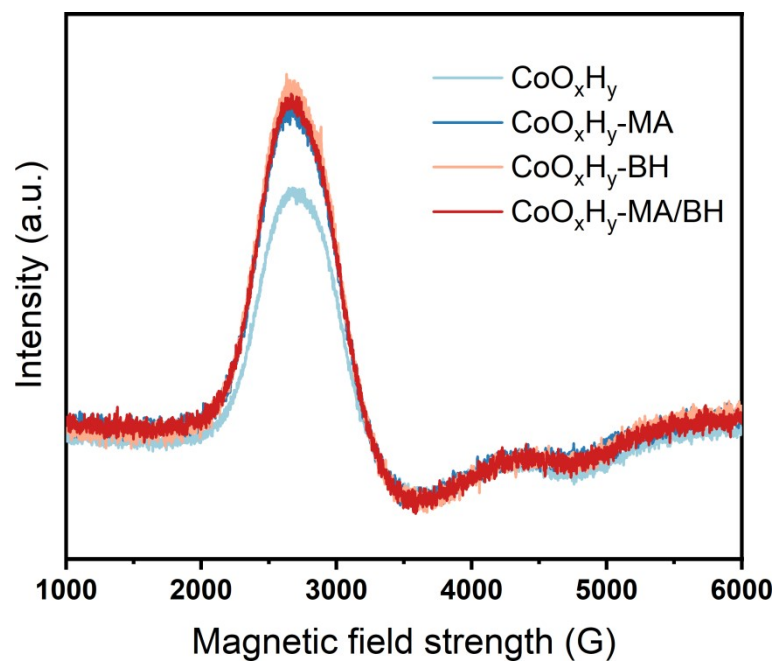

**Figure S7.** EPR signals against magnetic field strength of  $\text{CoO}_x\text{H}_y$ ,  $\text{CoO}_x\text{H}_y\text{-MA}$ ,  $\text{CoO}_x\text{H}_y\text{-BH}$ , and  $\text{CoO}_x\text{H}_y\text{-MA/BH}$ .

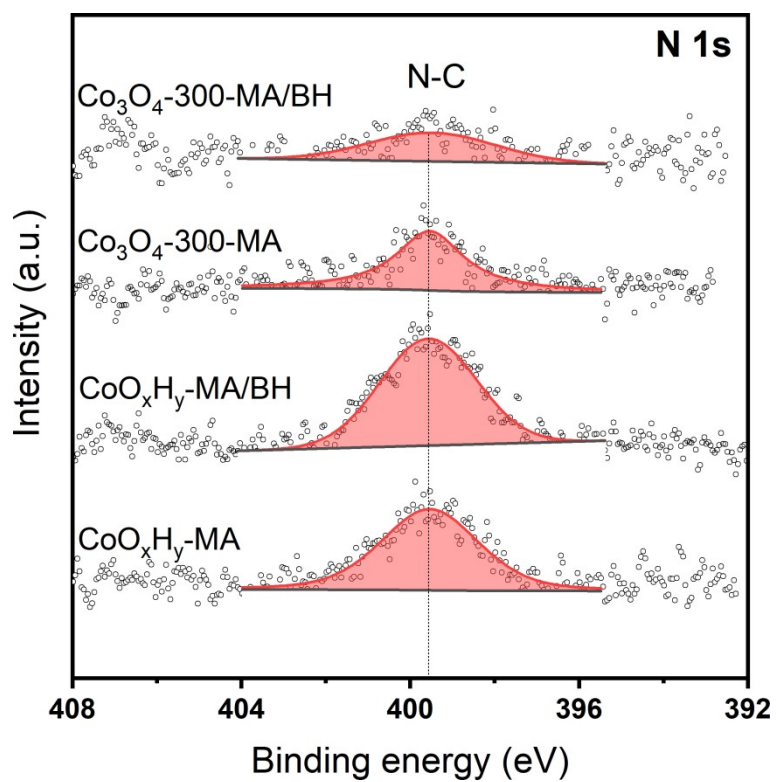

**Figure S8.** XPS N 1s spectra of  $\text{CoO}_x\text{H}_y\text{-MA}$ ,  $\text{CoO}_x\text{H}_y\text{-MA/BH}$ ,  $\text{Co}_3\text{O}_4\text{-300-MA}$ , and  $\text{Co}_3\text{O}_4\text{-300-MA/BH}$ .

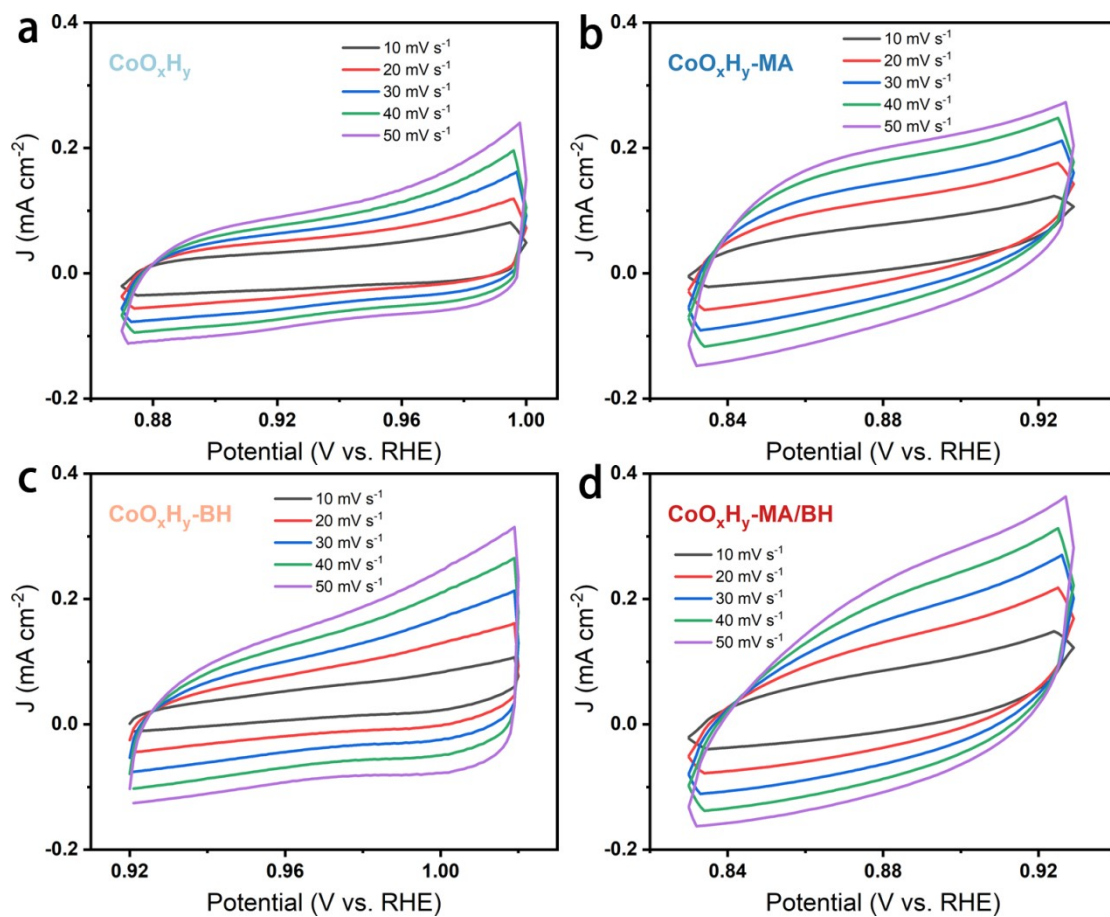

**Figure S9.** CVs at different scanning rates from 10 to 50 mV s<sup>-1</sup> of (a) CoO<sub>x</sub>H<sub>y</sub>, (b) CoO<sub>x</sub>H<sub>y</sub>-MA, (c) CoO<sub>x</sub>H<sub>y</sub>-BH, and (d) CoO<sub>x</sub>H<sub>y</sub>-MA/BH.

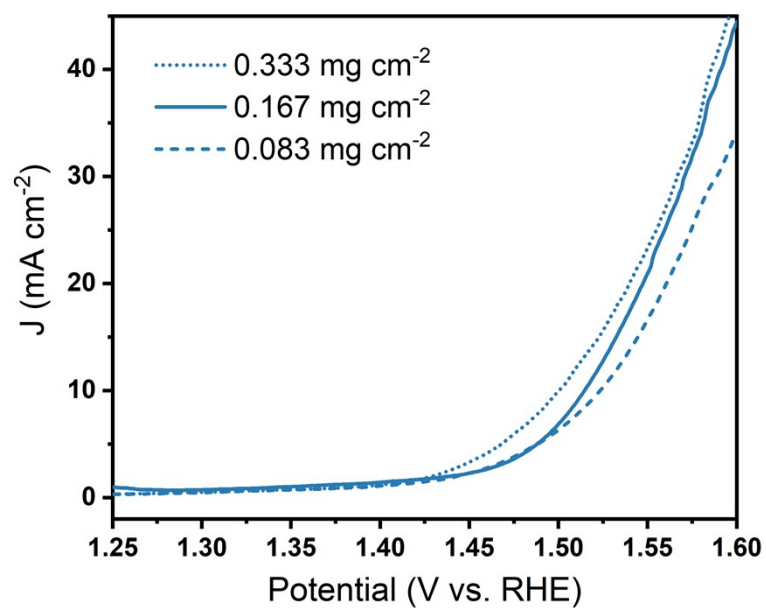

**Figure S10.** The HMFOR LSVs of  $\text{CoO}_x\text{H}_y\text{-MA}$  with different loadings on the glassy carbon electrode in 1 M KOH solution containing 5 mM HMF at a scanning rate of  $5 \text{ mV s}^{-1}$ .

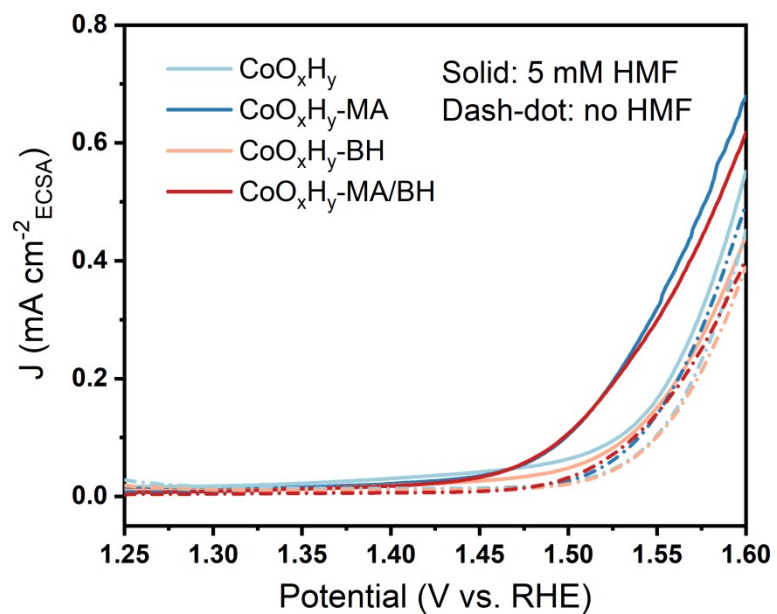

**Figure S11.** The HMF and OER performance of CoO<sub>x</sub>H<sub>y</sub>, CoO<sub>x</sub>H<sub>y</sub>-MA, CoO<sub>x</sub>H<sub>y</sub>-BH, and CoO<sub>x</sub>H<sub>y</sub>-MA/BH after normalization to their electrochemical surface area.

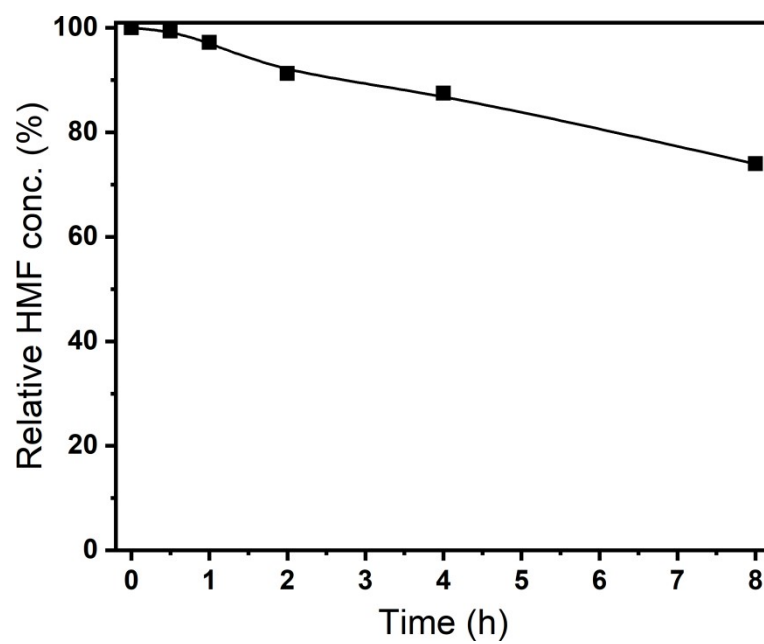

**Figure S12.** HMF thermodegradation of 5 mM HMF in 1 M KOH without electrocatalysts.

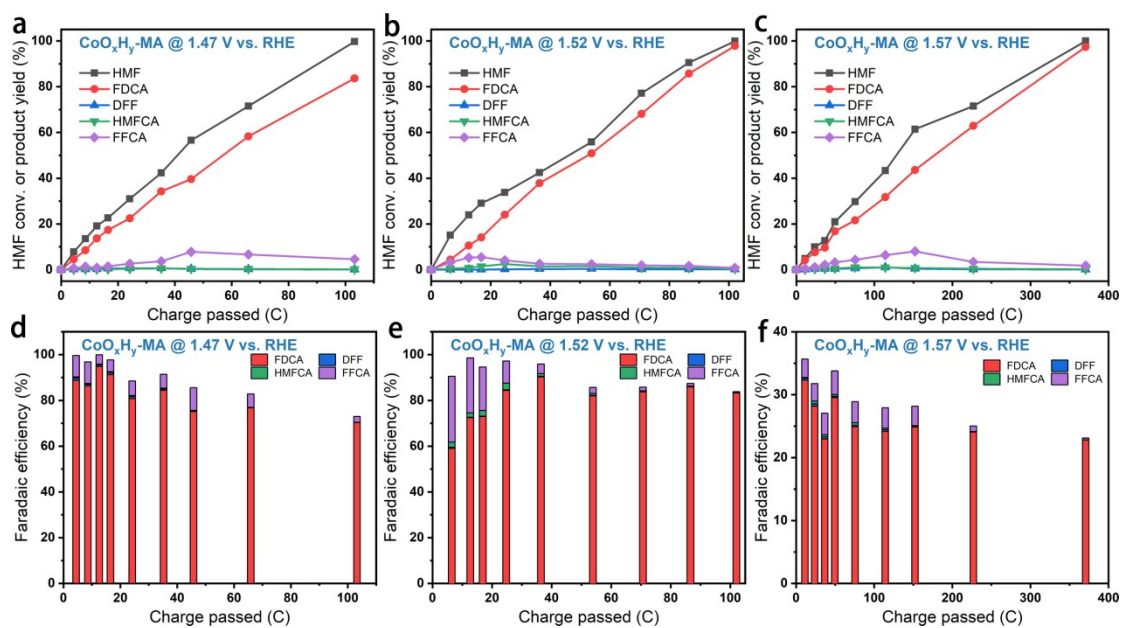

**Figure S13.** (a, b, c) The conversion of HMF and the yields of oxidation products, and (d, e, f) the corresponding Faradaic efficiency of CoO<sub>x</sub>H<sub>y</sub>-MA in 1.0 M KOH containing 5 mM HMF at different potentials of (a, d) 1.47, (b, e) 1.52, and (c, f) 1.57 V, respectively.

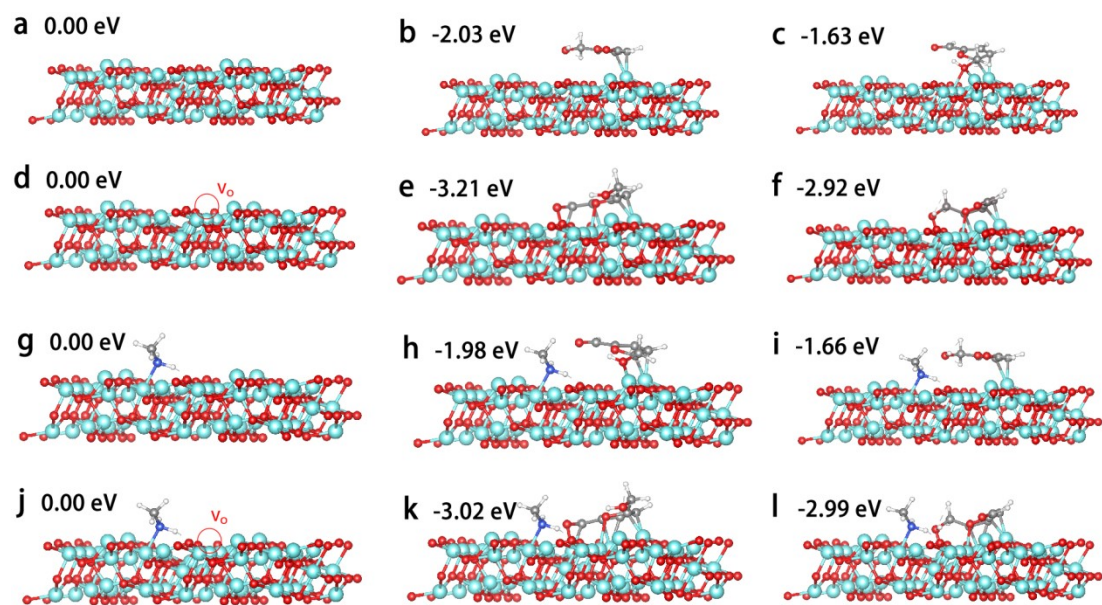

**Figure S14.** DFT-calculated adsorption configurations for  $\text{Co}_3\text{O}_4$  catalysts: (a, b, c) (3 1 1) surface, (d, e, f) in the presence of surface oxygen vacancy ( $V_{\text{O}}$ ) site, (g, h, i) in the presence of chemisorbed methylamine (MA) molecule, and (j, k, l) in the presence of  $V_{\text{O}}$  and MA. (b, d, g, j) represent the adsorption behavior of HMF starting from its -CHO group, and (c, f, i, l) represent the adsorption behavior of HMF starting from its -C-OH group.
